# Supplementary material for: Evaluating the Use of Graph Neural Networks and Transfer Learning for Oral Bioavailability Prediction
Source: PubMed Central journal article supplement — J Chem Inf Model. 2023 Aug 15;63(16):5035–44. doi: 10.1021/acs.jcim.3c00554 (PMC10467575; doi:10.1021/acs.jcim.3c00554), 2023-08-15
Supplement: ci3c00554_si_001.pdf [file ci3c00554_si_001.pdf]

## SUPPORTING INFORMATION

### Evaluating the Use of Graph Neural Network and Transfer Learning for Oral Bioavailability Prediction

Sherwin S.S. Ng, Yunpeng Lu

School of Chemistry, Chemical Engineering and Biotechnology, Nanyang Technological University, 21 Nanyang Link, Singapore 637371.

#### A. Hyperparameters for Random Forests models

All Random Forest models were optimised using Optuna<sup>1</sup> in 30 evaluations and five-fold cross validation method using oral bioavailability train dataset.

**Table S1.** Best parameters for Random Forest models.

|                       | <b>n_estimators</b> | <b>max_depth</b> |
|-----------------------|---------------------|------------------|
| Molecular Descriptors | 76                  | 96               |
| Morgan Fingerprints   | 89                  | 40               |
| RDKit Fingerprints    | 28                  | 11               |
| MACCSkeyys            | 85                  | 46               |

#### B. Hyperparameters for GNN models

All GNN models were optimised using Optuna<sup>1</sup> in 30 evaluations and five-fold cross validation method using oral bioavailability train dataset.

**Table S2.** Best parameters for GIN model.

| <b>Hyperparameters</b> | <b>Values</b>       |
|------------------------|---------------------|
| num_layers             | 1                   |
| hidden_size            | 66                  |
| learning_rate          | 0.00889495369073538 |

**Table S3.** Best parameters for Graph Transformer model.

| <b>Hyperparameters</b> | <b>Values</b>        |
|------------------------|----------------------|
| num_layers             | 2                    |
| hidden_size            | 439                  |
| n_heads                | 1                    |
| dropout                | 0.269754753387312    |
| learning_rate          | 0.007890910361468965 |

**Table S4.** Best parameters for Vertical GNN model.

| <b>Hyperparameters</b> | <b>Values</b>       |
|------------------------|---------------------|
| num_gin_layers         | 2                   |
| num_graph_trans_layer  | 2                   |
| hidden_size            | 122                 |
| n_heads                | 2                   |
| dropout                | 0.36738054656589025 |
| learning_rate          | 0.00452976319043267 |

**C. Hyperparameters for Transfer Learning GNN Models**

All Transfer Learning GNN models were optimised using Optuna<sup>1</sup> in 30 evaluations using solubility train and validation dataset.

**Table S5.** Best parameters for Transfer Learning Vertical GNN model.

| <b>Hyperparameters</b> | <b>Values</b>         |
|------------------------|-----------------------|
| num_gin_layers         | 2                     |
| num_graph_trans_layer  | 2                     |
| hidden_size            | 245                   |
| n_heads                | 1                     |
| dropout                | 0.30146027310173296   |
| learning_rate          | 0.0012649520485726895 |

**Table S6.** Best parameters for Transfer Learning Pre-Trained Vertical GNN model.

| <b>Hyperparameters</b> | <b>Values</b>          |
|------------------------|------------------------|
| learning_rate          | 0.00012649520485726895 |
| es_trigger             | 15                     |

#### D. List of Molecular Descriptors

**Table S7.** Descriptions of the 45 molecular descriptors used to build random forest model to predict oral bioavailability.

| Molecular Descriptors | Categories                               | Details                                                                              |
|-----------------------|------------------------------------------|--------------------------------------------------------------------------------------|
| MaxEStateIndex        | Basic EState descriptors                 | States the maximum EState index                                                      |
| MinEStateIndex        | Basic EState descriptors                 | States the minimum EState index                                                      |
| MaxAbsEStateIndex     | Basic EState descriptors                 | States the maximum absolute EState index                                             |
| MinAbsEStateIndex     | Basic EState descriptors                 | State the minimum absolute EState index                                              |
| qed                   | quantitative estimation of drug-likeness | States the weighted sum of ADS-mapped properties                                     |
| MolWt                 | General descriptors                      | States the average molecular weight of a molecule                                    |
| HeavyAtomMolWt        | General descriptors                      | States the average molecular weight of a molecule with the removal of hydrogen atoms |
| ExactMolWt            | General descriptors                      | States the exact molecular weight of a molecule                                      |
| NumValenceElectrons   | General descriptors                      | States the number of valence electrons a molecule possesses                          |
| MaxPartialCharge      | General descriptors                      | States the maximum partial charge                                                    |
| MinPartialCharge      | General descriptors                      | States the minimal partial charge                                                    |
| MaxAbsPartialCharge   | General descriptors                      | States the maximum absolute partial charge                                           |
| MinAbsPartialCharge   | General descriptors                      | States the minimal absolute partial charge                                           |
| FpDensityMorgan1      | General descriptors                      | Morgan fingerprint, radius 1                                                         |
| FpDensityMorgan2      | General descriptors                      | Morgan fingerprint, radius 2                                                         |
| FpDensityMorgan3      | General descriptors                      | Morgan fingerprint, radius 3                                                         |
| BCUT2D_MWHI           | BCUT descriptors                         | Highest eigenvalue of Burden matrix weighted by atomic masses                        |
| BCUT2D_MWLOW          | BCUT descriptors                         | Lowest eigenvalue of Burden matrix weighted by atomic masses                         |
| BCUT2D_CHGHI          | BCUT descriptors                         | the highest eigenvalue of Burden matrix weighted by gasteiger charges                |
| BCUT2D_CHGLO          | BCUT descriptors                         | the lowest eigenvalue of Burden matrix weighted by gasteiger charges                 |
| BCUT2D_LOGPHI         | BCUT descriptors                         | the highest eigenvalue of Burden matrix weighted by Crippen LogP                     |
| BCUT2D_LOGPLOW        | BCUT descriptors                         | the lowest eigenvalue of Burden matrix weighted by Crippen LogP                      |

|                |                                                         |                                                                                                                                                   |
|----------------|---------------------------------------------------------|---------------------------------------------------------------------------------------------------------------------------------------------------|
| BCUT2D_MRHI    | BCUT descriptors                                        | the highest eigenvalue of Burden matrix weighted by Crippen MR                                                                                    |
| BCUT2D_MRLOW   | BCUT descriptors                                        | the lowest eigenvalue of Burden matrix weighted by Crippen MR                                                                                     |
| BalabanJ       | Topological/topochemical descriptors                    | Balaban's J value                                                                                                                                 |
| BertzCT        | Topological/topochemical descriptors                    | A topological index meant to quantify "complexity"                                                                                                |
| Chi0           | Topological/topochemical descriptors                    | From equations (1), (9) and (10) of reference 2                                                                                                   |
| Chi0n          | Topological/topochemical descriptors                    | Similar to Hall Kier Chi0v, but uses nVal instead of valence.                                                                                     |
| Chi0v          | Topological/topochemical descriptors                    | From equations (5),(9) and (10) of reference 2                                                                                                    |
| Chi1           | Topological/topochemical descriptors                    | From equations (1),(11) and (12) of reference 2                                                                                                   |
| Chi1n          | Topological/topochemical descriptors                    | Similar to Hall Kier Chi1v, but uses nVal instead of valence                                                                                      |
| Chi1v          | Topological/topochemical descriptors                    | From equations (5),(11) and (12) of reference 2                                                                                                   |
| Chi2n          | Topological/topochemical descriptors                    | Similar to Hall Kier Chi2v, but uses nVal instead of valence.                                                                                     |
| Chi2v          | Topological/topochemical descriptors                    | From equations (5),(15) and (16) of reference 2                                                                                                   |
| Chi3n          | Topological/topochemical descriptors                    | Similar to Hall Kier Chi3v, but uses nVal instead of valence.                                                                                     |
| Chi3v          | Topological/topochemical descriptors                    | From equations (5),(15) and (16) of reference 2                                                                                                   |
| HallKierAlpha  | Topological/topochemical descriptors                    | The Hall-Kier alpha value for a molecule                                                                                                          |
| Ipc            | Topological/topochemical descriptors                    | The information content of the coefficients of the characteristic polynomial of the adjacency matrix of a hydrogen-suppressed graph of a molecule |
| Kappa1         | Topological/topochemical descriptors                    | Hall-Kier Kappa1 value                                                                                                                            |
| Kappa2         | Topological/topochemical descriptors                    | Hall-Kier Kappa2 value                                                                                                                            |
| Kappa3         | Topological/topochemical descriptors                    | Hall-Kier Kappa3 value                                                                                                                            |
| LabuteASA      | MOE-like approximate molecular surface area descriptors | Labute's Approximate Surface Area (ASA from MOE)                                                                                                  |
| HeavyAtomCount | Lipinski parameters for molecules                       | States the number of heavy atoms a molecule                                                                                                       |

|         |                                                                |                            |
|---------|----------------------------------------------------------------|----------------------------|
| MolLogP | Atom-based calculation of LogP and MR using Crippen's approach | Wildman-Crippen LogP value |
| MolMR   | Atom-based calculation of LogP and MR using Crippen's approach | Wildman-Crippen MR value   |

### ***E. Solubility Dataset Splitting Strategy***

Firstly, we calculated the Tanimoto similarity scores between the solubility dataset and oral bioavailability test dataset. The molecules were then arranged in order from the smallest to the largest according to the Tanimoto similarity scores. The first 5000 molecules were classified as low similarity, the 2501<sup>th</sup> molecule to 7500<sup>th</sup> molecules were classified as low similarity and 4845<sup>th</sup> molecule to the last molecule were classified as high similarity. Thus, creating 3 datasets of different similarity level. This is a similar method adopted from Farsi<sup>3</sup> and inspired from k-fold cross-validation methodology where overlapping train datasets are formed from splitting thus generating more permutation and hence more datasets for training purposes.

**Figure S1.** Splitting strategy for solubility dataset.

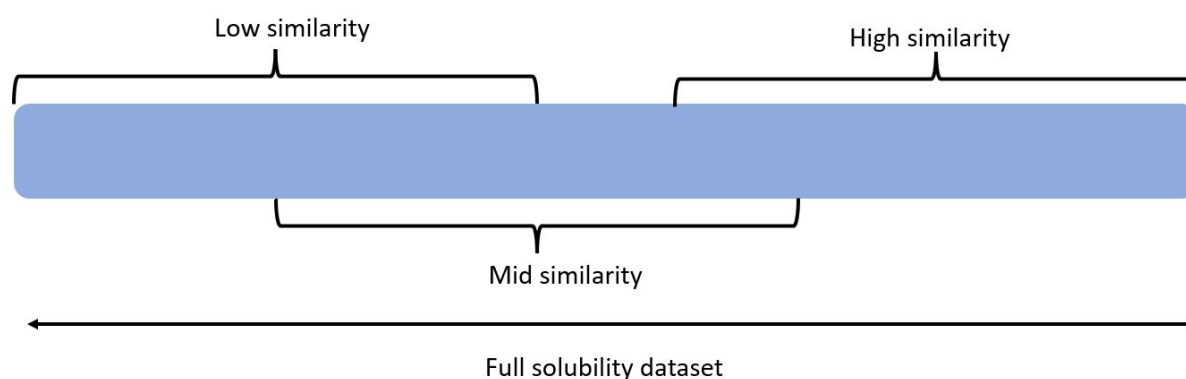

### F. Prediction Performance of pre-trained models during five-fold cross-validation

**Table S8.** Prediction performance for oral bioavailability prediction during five-fold cross-validation comparing different pre-training epochs <sup>a</sup>

| Number of pre-training epochs | Metrics  | Data Similarity Level |                    |                    |                    |
|-------------------------------|----------|-----------------------|--------------------|--------------------|--------------------|
|                               |          | Low (5000)            | Mid (5000)         | High (5000)        | Mid (9844)         |
| 20                            | Log Loss | 0.648±0.028           | 0.655±0.019        | 0.637±0.033        | 0.633±0.032        |
|                               | Acc      | 0.613±0.069           | 0.620±0.059        | 0.632±0.069        | 0.622±0.056        |
|                               | F1 Score | 0.633±0.154           | 0.571±0.296        | <b>0.682±0.109</b> | 0.632±0.136        |
|                               | AUC-ROC  | 0.602±0.059           | 0.559±0.085        | <b>0.646±0.056</b> | 0.648±0.056        |
| 40                            | Log Loss | 0.642±0.025           | 0.644±0.032        | <b>0.640±0.032</b> | 0.625±0.043        |
|                               | Acc      | 0.628±0.054           | 0.623±0.053        | 0.637±0.054        | <b>0.642±0.070</b> |
|                               | F1 Score | <b>0.635±0.142</b>    | 0.564±0.281        | 0.679±0.102        | <b>0.642±0.142</b> |
|                               | AUC-ROC  | 0.627±0.042           | 0.625±0.073        | 0.627±0.059        | 0.655±0.081        |
| 60                            | Log Loss | <b>0.632±0.037</b>    | <b>0.641±0.032</b> | <b>0.640±0.027</b> | <b>0.636±0.044</b> |
|                               | Acc      | <b>0.634±0.060</b>    | <b>0.629±0.053</b> | <b>0.639±0.066</b> | 0.636±0.074        |
|                               | F1 Score | 0.631±0.147           | <b>0.651±0.128</b> | 0.671±0.118        | 0.636±0.150        |
|                               | AUC-ROC  | <b>0.662±0.061</b>    | <b>0.651±0.045</b> | <b>0.646±0.051</b> | <b>0.662±0.071</b> |

<sup>a</sup> Prediction performance for oral bioavailability train dataset during five-fold cross-validation reported in mean ± standard deviation. Models were pre-trained with different number of epochs (20, 40, 60). Bold value represents the best score across different epoch level.

### G. Prediction Performance of Transfer Learning Model across different similarity levels

**Table S9.** Prediction Performance of Transfer Learning Model across different similarity levels <sup>b</sup>

| Similarity (Size) | Low (5000)  | Mid (5000)  | High (5000)        | Mid (9844)         |
|-------------------|-------------|-------------|--------------------|--------------------|
| Log Loss          | 0.588±0.066 | 0.532±0.034 | 0.531±0.033        | <b>0.520±0.042</b> |
| Acc               | 0.718±0.053 | 0.729±0.025 | <b>0.755±0.022</b> | 0.737±0.020        |
| F1 Score          | 0.760±0.066 | 0.789±0.016 | <b>0.809±0.016</b> | 0.782±0.026        |
| AUC-ROC           | 0.746±0.041 | 0.799±0.027 | <b>0.801±0.024</b> | 0.795±0.044        |

<sup>b</sup> Vertical GNN models were pre-trained with solubility dataset of different similarity level for 60 epochs. Prediction performance using oral bioavailability test dataset were reported in mean ± standard deviation. Bold values represent the best score across different similarity level.

### H. SHAP Analysis of Random Forest Models

**Figure S2.** Beeswarm plot of top 20 important molecular descriptors for Random Forest model towards oral bioavailability prediction using oral bioavailability test dataset. Analysis done on model developed from the second fold dataset produced using five-fold cross-validation.

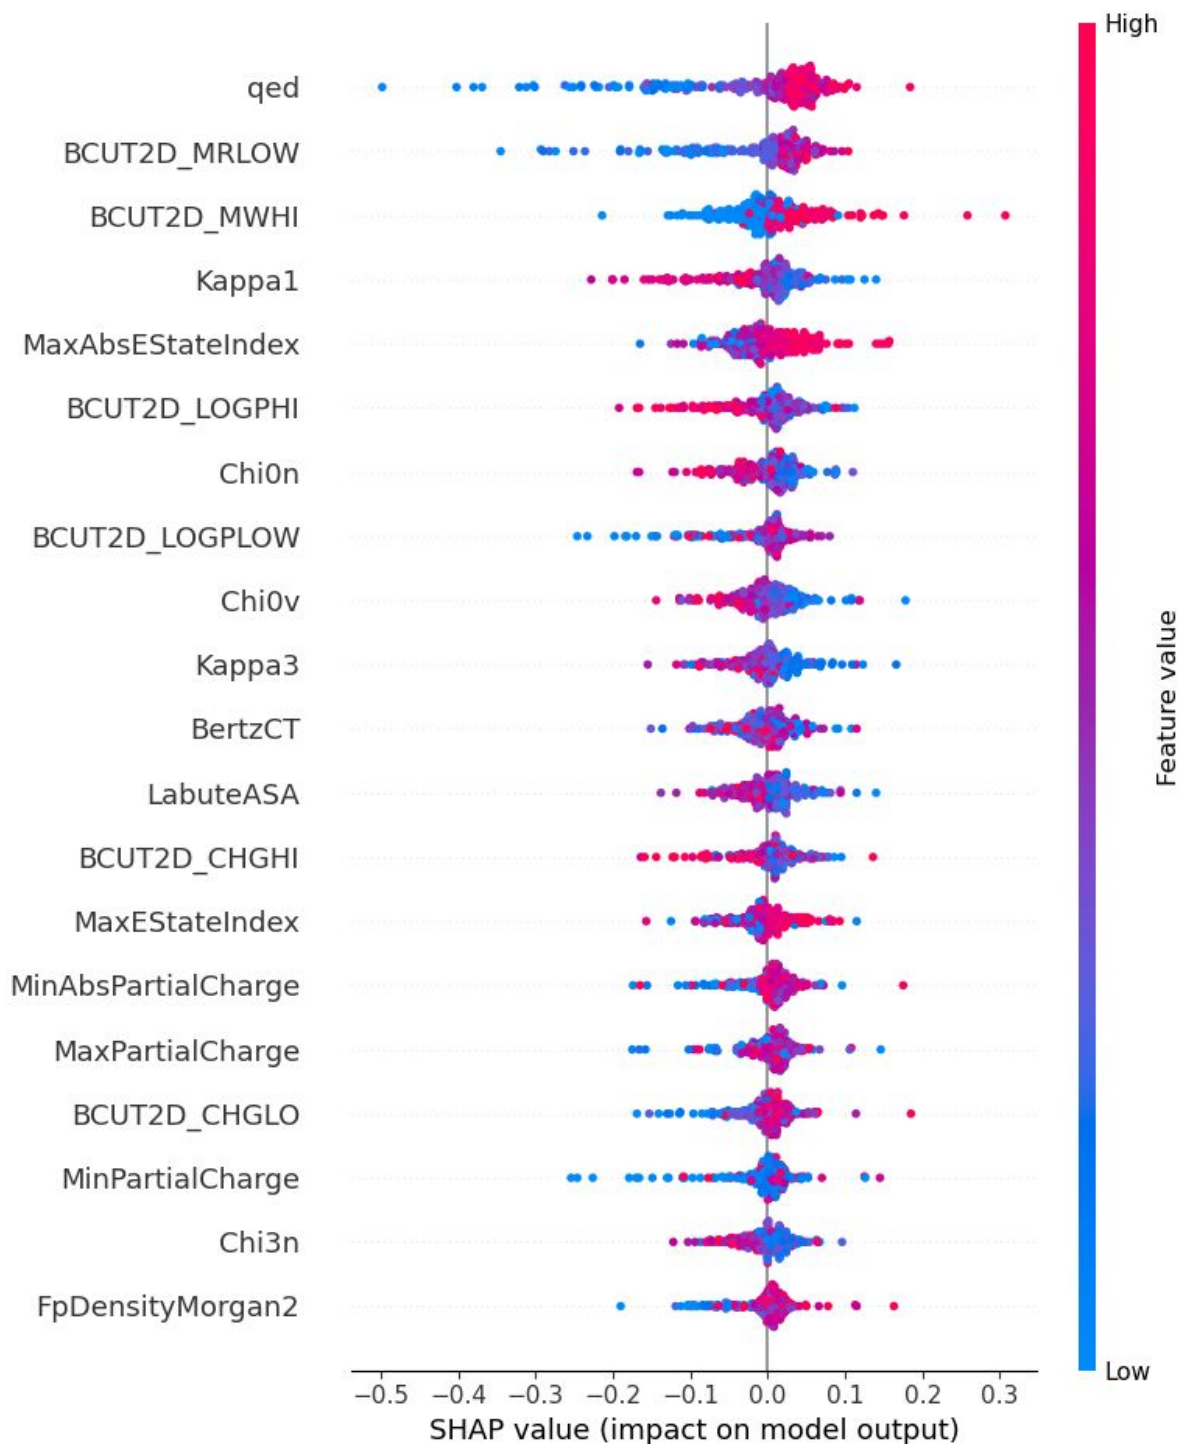

**Figure S3.** Beeswarm plot of top 20 important molecular descriptors for Random Forest model towards oral bioavailability prediction using oral bioavailability test dataset. Analysis done on model developed from the third fold dataset produced using five-fold cross-validation.

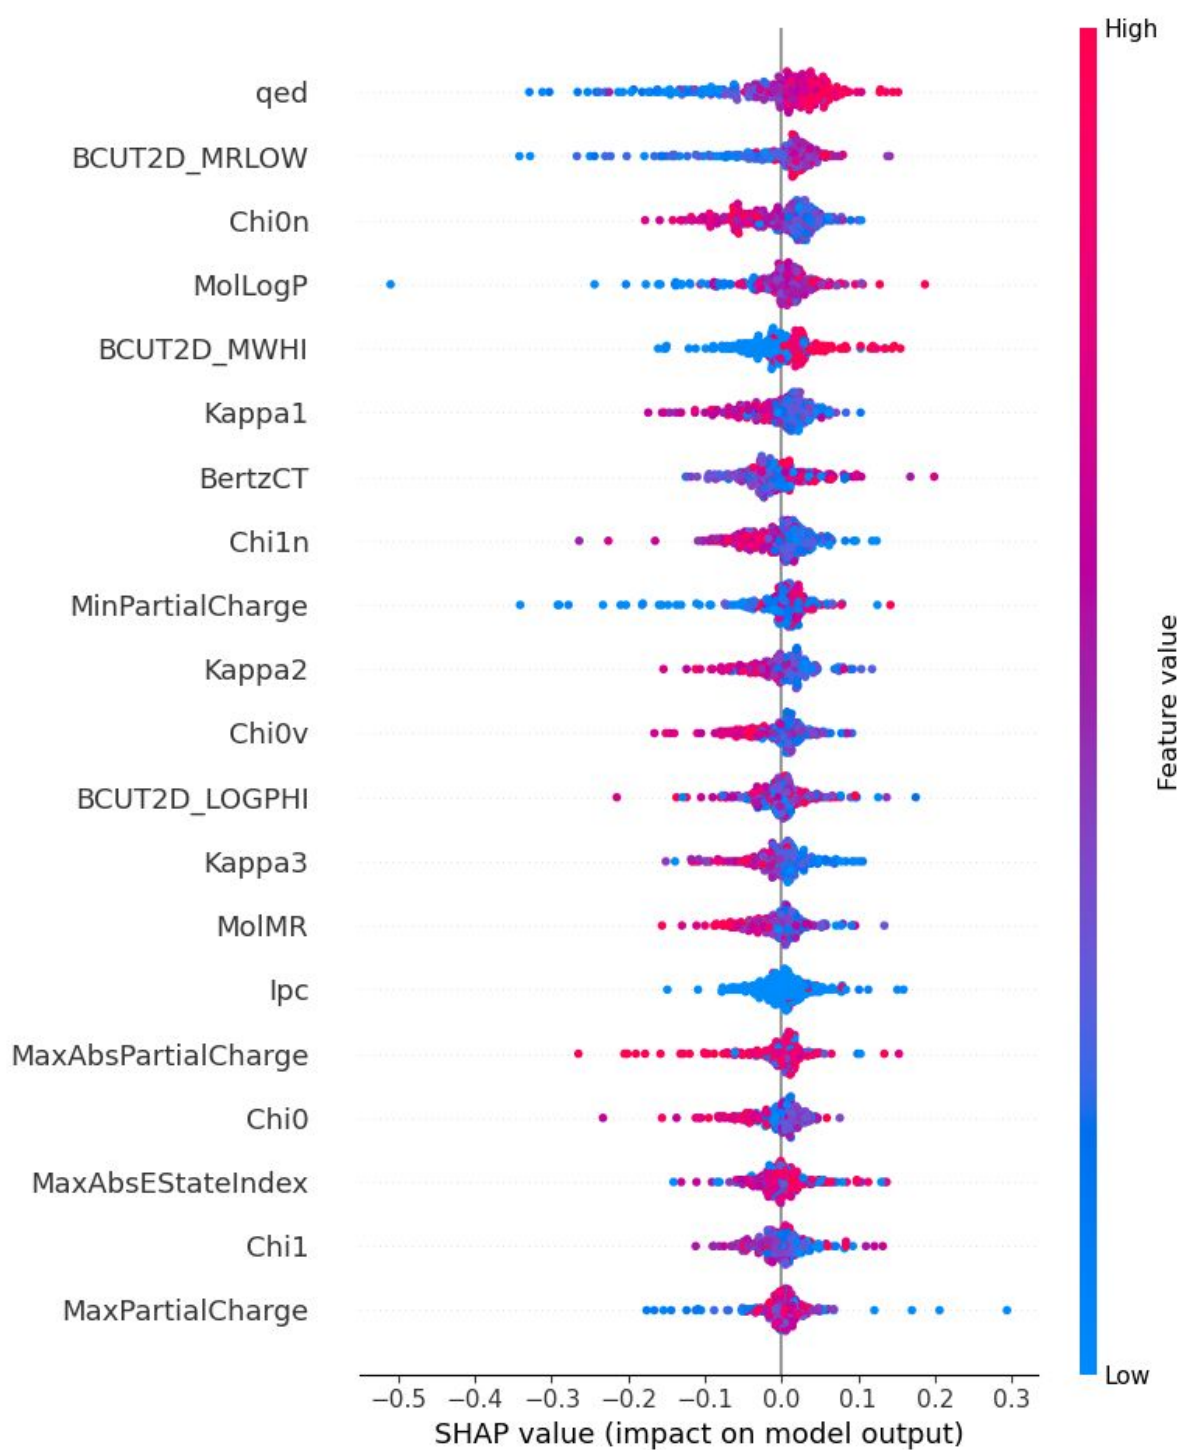



**Figure S4.** Beeswarm plot of top 20 important molecular descriptors for Random Forest model towards oral bioavailability prediction using oral bioavailability test dataset. Analysis done on model developed from the fourth fold dataset produced using five-fold cross-validation.

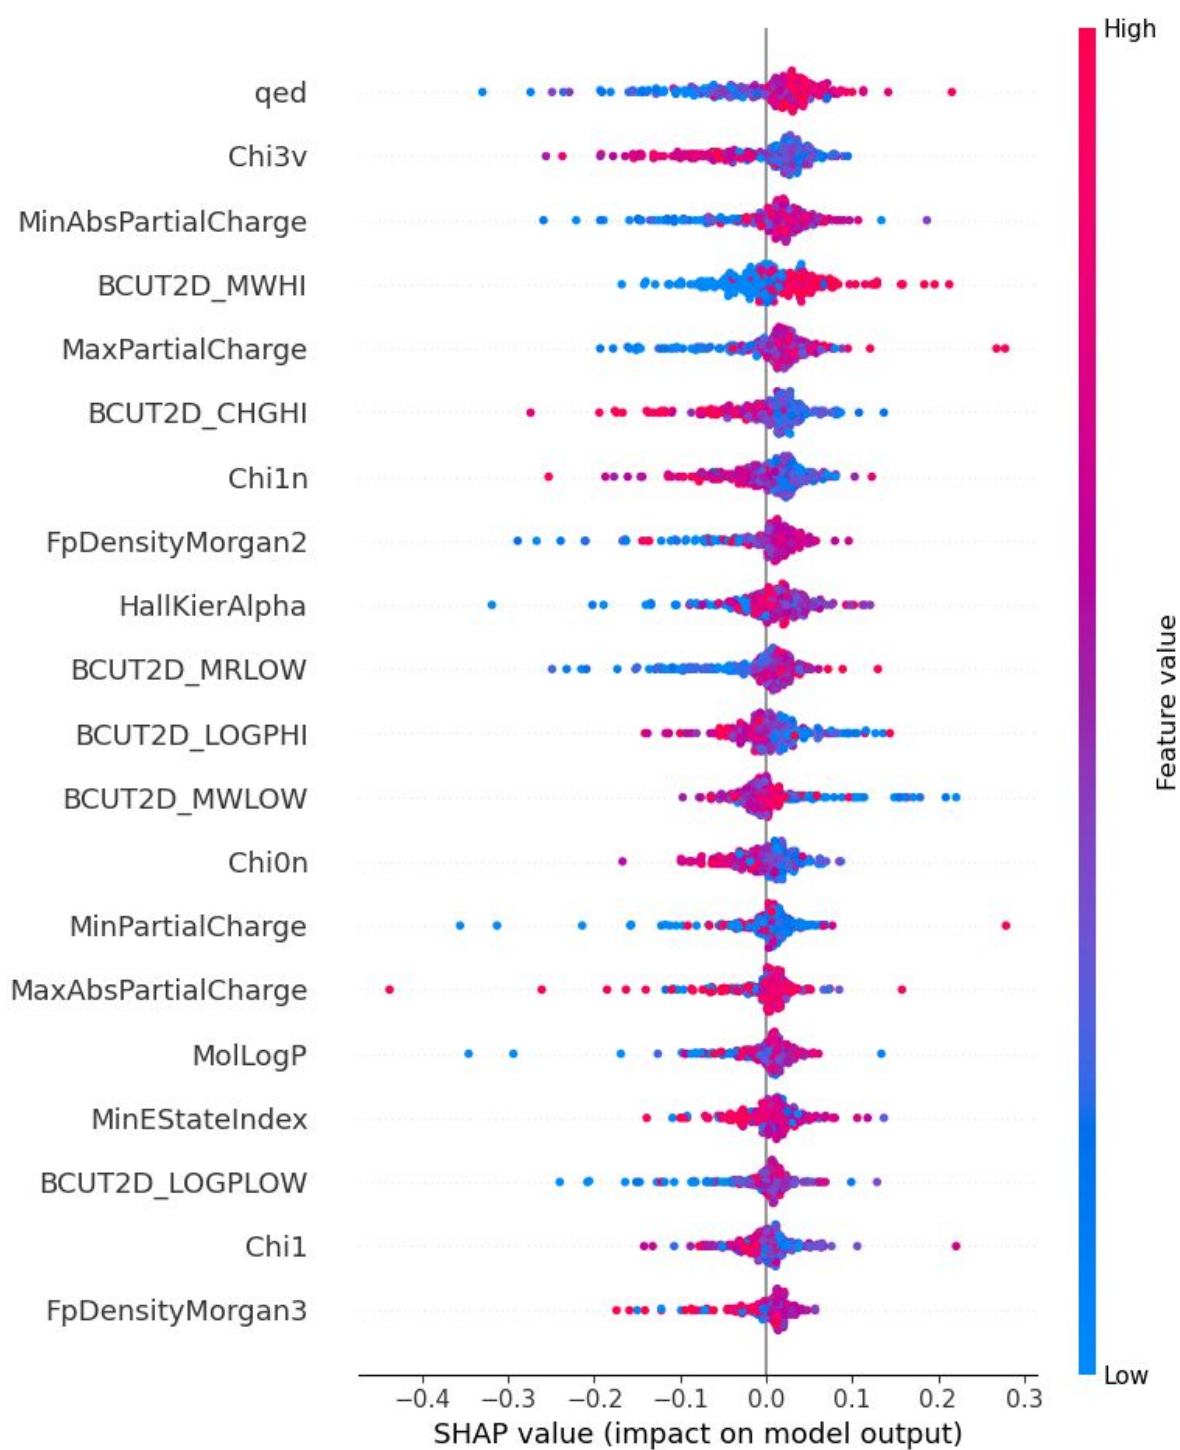

**Figure S5.** Beeswarm plot of top 20 important molecular descriptors for Random Forest model towards oral bioavailability prediction using oral bioavailability test dataset. Analysis done on model developed from the fifth fold dataset produced using five-fold cross-validation.

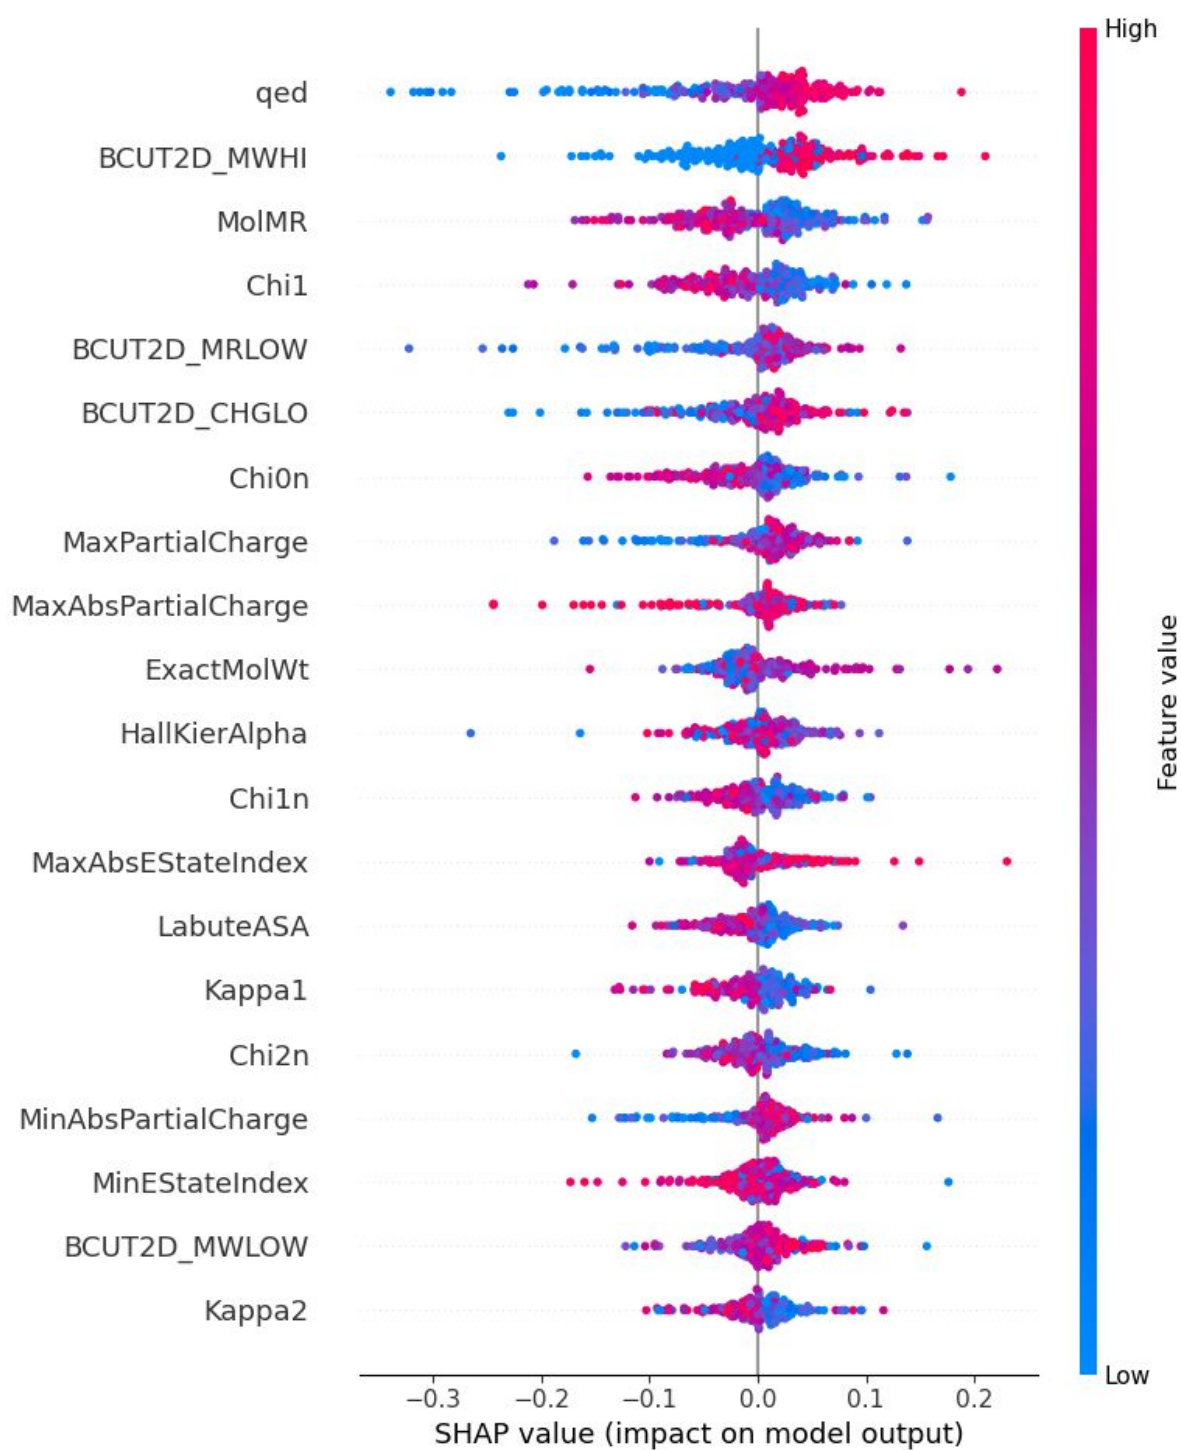

**Figure S6.** Global feature importance bar plot highlighting top 10 most important molecular descriptors. Absolute mean for that feature is taken over all the given sample. Analysis done on model developed from the first fold dataset produced using five-fold cross-validation.

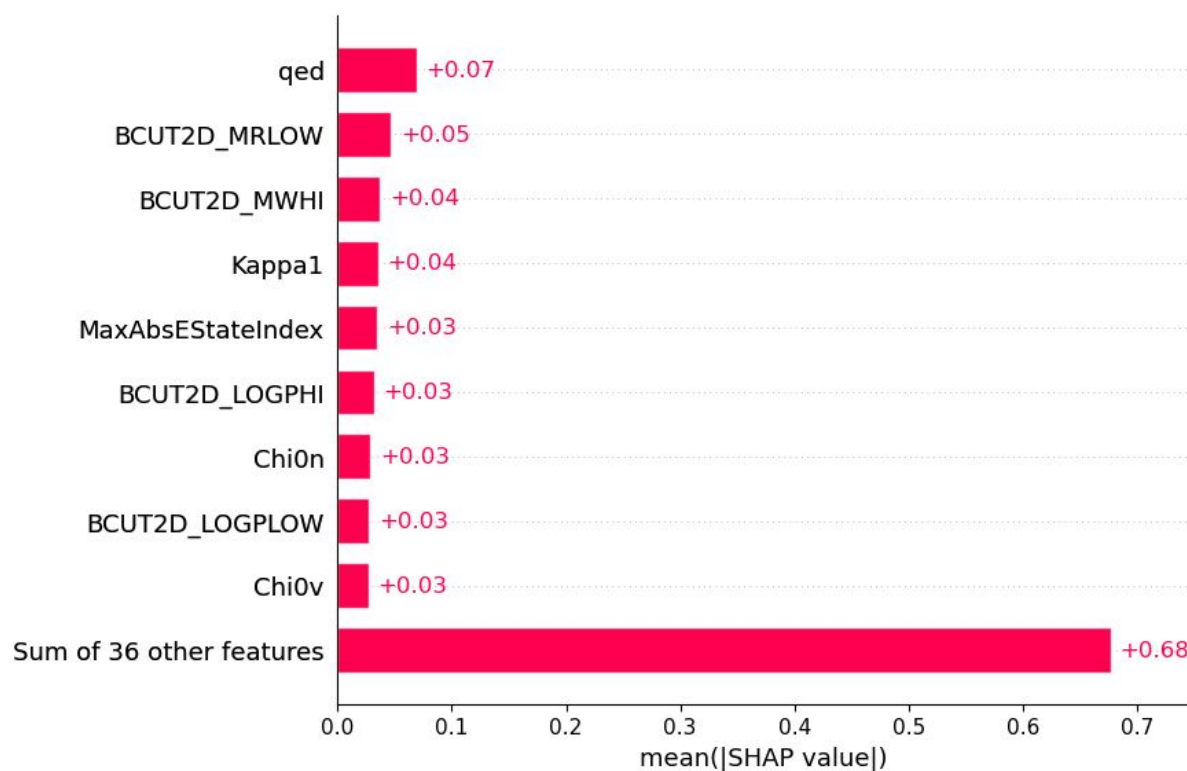

**Figure S7.** Global feature importance bar plot highlighting top 10 most important molecular descriptors. Absolute mean for that feature is taken over all the given sample. Analysis done on model developed from the second fold dataset produced using five-fold cross-validation.

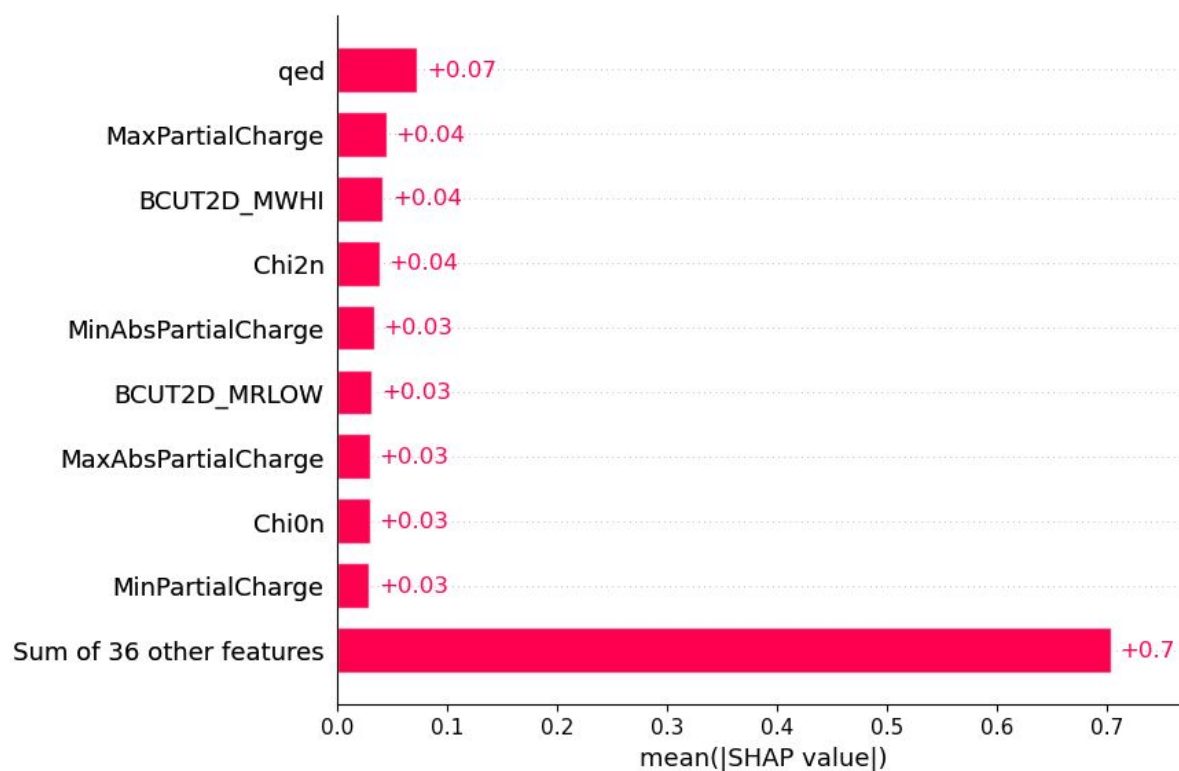

**Figure S8.** Global feature importance bar plot highlighting top 10 most important molecular descriptors. Absolute mean for that feature is taken over all the given sample Analysis done on model developed from the third fold dataset produced using five-fold cross-validation.

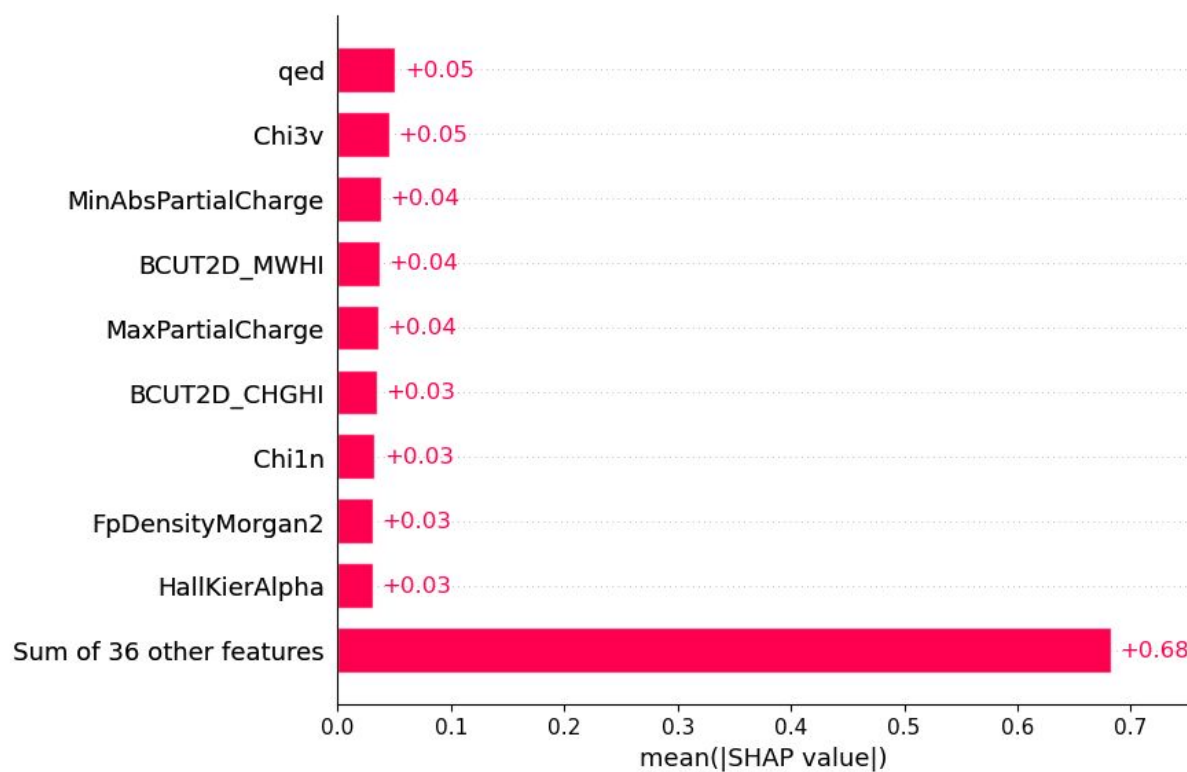

**Figure S9.** Global feature importance bar plot highlighting top 10 most important molecular descriptors. Absolute mean for that feature is taken over all the given sample. Analysis done on model developed from the fourth fold dataset produced using five-fold cross-validation.

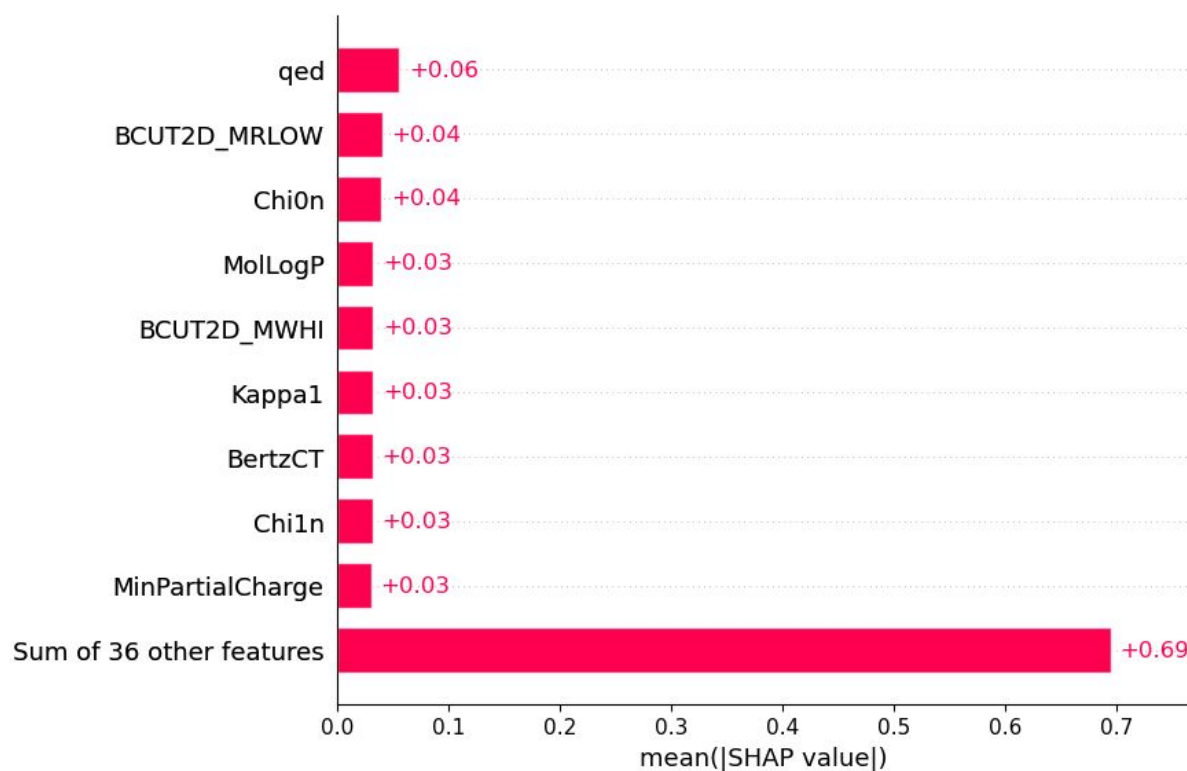

**Figure S10.** Global feature importance bar plot highlighting top 10 most important molecular descriptors. Absolute mean for that feature is taken over all the given sample. Analysis done on model developed from the fifth fold dataset produced using five-fold cross-validation.

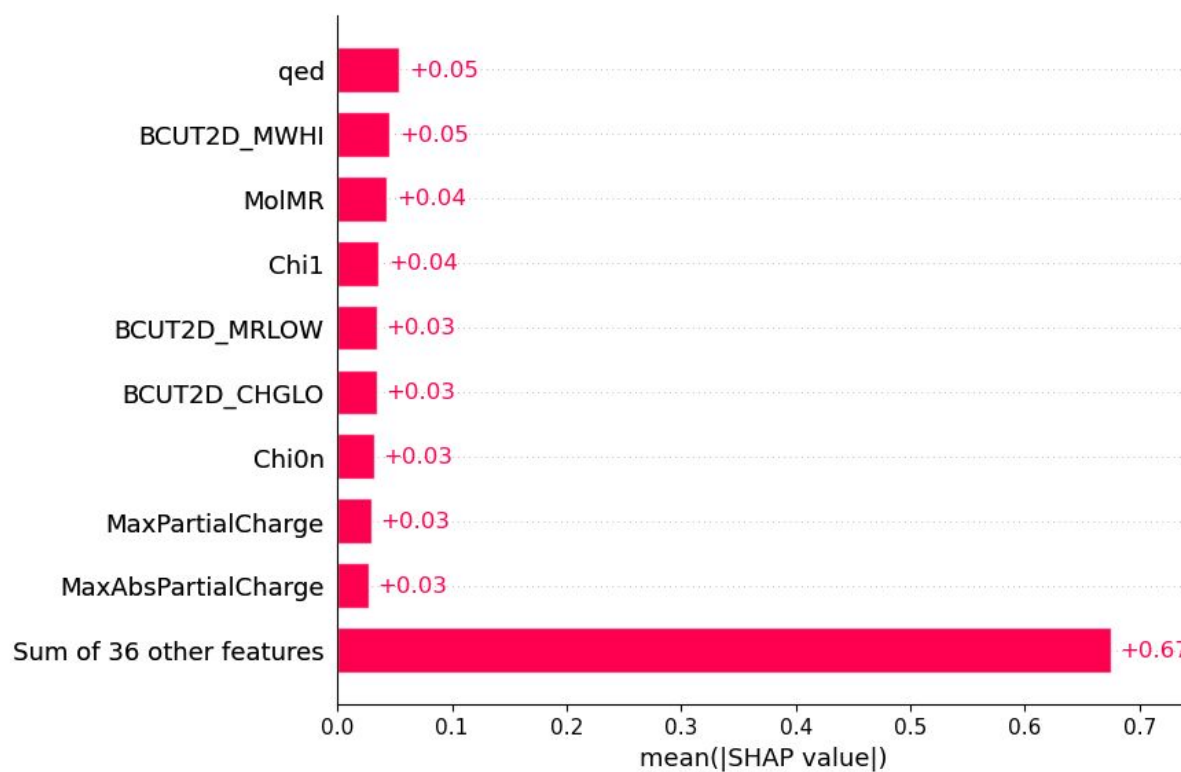

## **References**

1. Akiba, T.; Sano, S.; Yanase, T.; Ohta, T.; Koyama, M. Optuna: A next-Generation Hyperparameter Optimization Framework. In *Proceedings of the 25th ACM SIGKDD International Conference on Knowledge Discovery & Data Mining*; ACM: New York, NY, USA, 2019.
2. Hall, L. H.; Kier, L. B. The Molecular Connectivity Chi Indexes and Kappa Shape Indexes in Structure-Property Modeling. *Reviews in Computational Chemistry*. **2007**, 367–422.
3. Farsi, M. Application of Ensemble RNN Deep Neural Network to the Fall Detection through IoT Environment. *Alex. Eng. J.* **2021**, *60*, 199–211.
